# Supplementary material for: Susceptibility of the Different Oxygen-Sensing Probes to Interferences in Respirometric Bacterial Assays with Complex Media
Source: MDPI journal article supplement (doi:10.3390/s24010267), 2024-01-02
Supplement: s1 [file s1]

# Susceptibility of the Different Oxygen-Sensing Probes to Interferences in Respirometric Bacterial Assays with Complex Media

Chiara Zanetti <sup>1</sup>, Liang Li <sup>1</sup>, Rafael Di Lazaro Gaspar <sup>2</sup>, Elisa Santovito <sup>3</sup>, Sophia Elisseeva <sup>1</sup>, Stuart G. Collins <sup>4</sup>, Anita R. Maguire <sup>4</sup> and Dmitri B. Papkovsky <sup>1,\*</sup>

<sup>1</sup> School of Biochemistry and Cell Biology, University College Cork, Pharmacy Building, College Road, T12 K8AF Cork, Ireland; czanetti@ucc.ie (C.Z.); liang.li@ucc.ie (L.L.)

<sup>2</sup> Cell Analysis Division, Agilent Inc., Euro House, Little Island, T45 WK12 Cork, Ireland; rafael.gaspar@agilent.com

<sup>3</sup> National Research Council of Italy, Institute of Sciences of Food Production, Via Amendola 122/O, 70126 Bari, Italy; elisa.santovito@ispa.cnr.it

<sup>4</sup> School of Chemistry, University College Cork, Pharmacy Building, College Road, T12 YN60 Cork, Ireland; stuart.collins@ucc.ie (S.G.C.); a.maguire@ucc.ie (A.R.M.)

\* Correspondence: d.papkovsky@ucc.ie; Tel.: +353-21-490-1698

**Table S1.** Composition of the different media.

| Selective Media                   | Ingredient                     | Concentration |
|-----------------------------------|--------------------------------|---------------|
| Nutrient Broth (NB)               | “Lab-lemco” Powder             | 1.0 g/L       |
|                                   | Peptone                        | 5.0 g/L       |
|                                   | Sodium chloride                | 5.0 g/L       |
|                                   | yeast extract                  | 2.0 g/L       |
| MacConkey (MC)                    | Bile salts                     | 5.0 g/L       |
|                                   | neutral red                    | 0.075 g/L     |
|                                   | Peptone                        | 20.0 g/L      |
|                                   | Sodium chloride                | 5.0 g/L       |
| M-Lauryl Sulfate (MLS)            | phenol red                     | 0.2 g/L       |
|                                   | sodium lauryl sulfate          | 1 g/L         |
|                                   | yeast extract                  | 6 g/L         |
|                                   | lactose                        | 30 g/L        |
| Rapid Coliform ChromoSelect (RCC) | X-gal                          | 0.08 g/L      |
|                                   | MUG (4-Methylumbelliferyl a    | 0.05 g/L      |
|                                   | IPTG                           | 0.1 g/L       |
|                                   | Peptone                        | 5 g/L         |
|                                   | dipotassium hydrogen phosphate | 2.7 g/L       |
|                                   | potassium dihydrogen phosphate | 2 g/L         |
|                                   | sodium lauryl sulfate          | 0.1 g/L       |
|                                   | sorbitol                       | 1 g/L         |
|                                   | sodium chloride                | 5 g/L         |
| Minerals Modified Glutamate (MMG) | bromocresol purple             | 0.02 g/L      |
|                                   | ferric ammonium citrate        | 0.02 g/L      |
|                                   | magnesium sulfate              | 0.2 g/L       |
|                                   | nicotinic acid                 | 0.002 g/L     |
|                                   | lactose                        | 20 g/L        |
|                                   | pantothenic acid               | 0.002 g/L     |
|                                   | sodium formate                 | 0.5 g/L       |
|                                   | calcium chloride               | 0.02 g/L      |
|                                   | L-cystine                      | 0.04 g/L      |
|                                   | dipotassium phosphate          | 1.8 g/L       |
|                                   | L-arginine                     | 0.04 g/L      |
|                                   | L-aspartic acid                | 0.048 g/L     |
|                                   | thiamine                       | 0.002 g/L     |

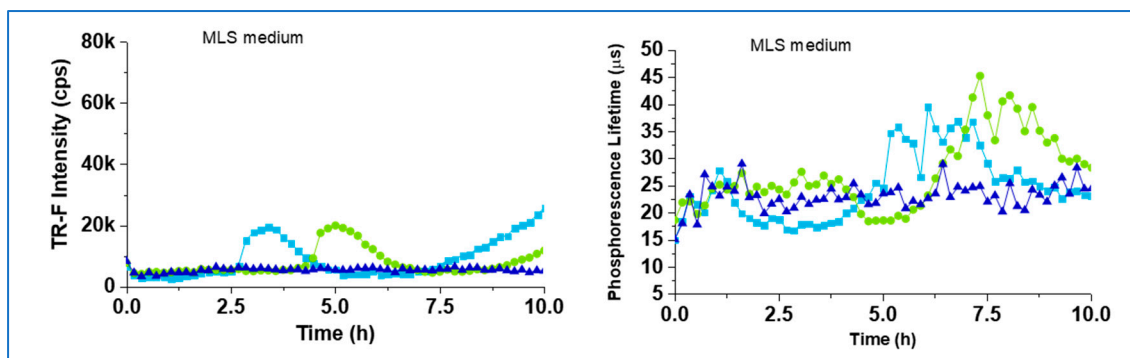

**Figure S1.** Blank-corrected respiration profiles of the Int and LT signals for *E. coli* cells in MLS media, produced by PtGlc4 shown in Figure 3E.

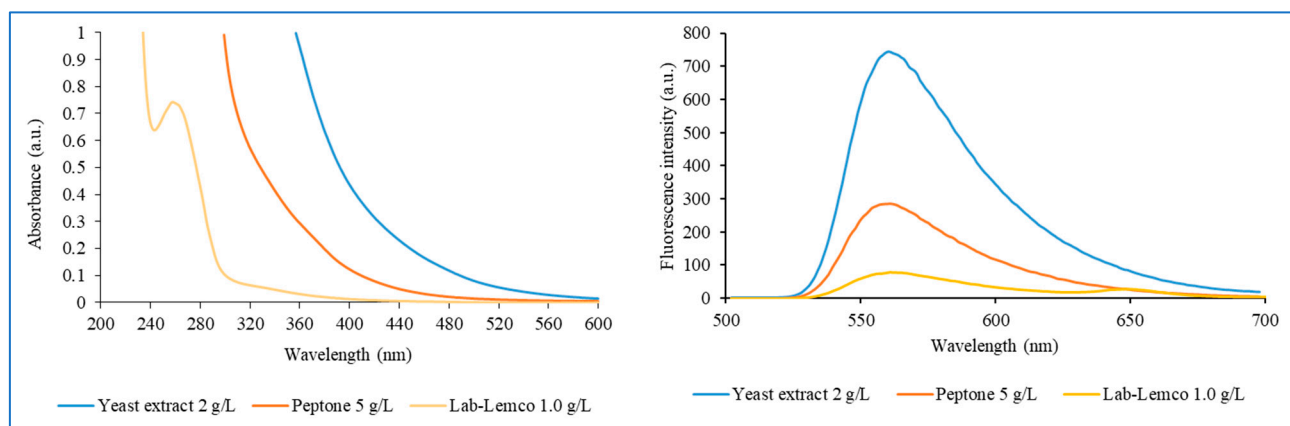

**Figure S2.** Absorption and fluorescence spectra of yeast extract (2.0 g/L), peptone (5.0 g/L) and Lab-Lemco (1.0 g/L) in PBS buffer.
